# Supplementary material for: Development and Validation of a CT Radiomics and Deep Learning-Based Model for Predicting Surgical Difficulty in Laparoscopic Pancreaticoduodenectomy
Source: Research Square preprint supplement (doi:10.21203/rs.3.rs-7501463/v1), 2025-09-12

Supplementary material_1. Double-layered pie chart of perioperative outcomes between the difficult and non-difficult groups in laparoscopic pancreaticoduodenectomy (LPD)


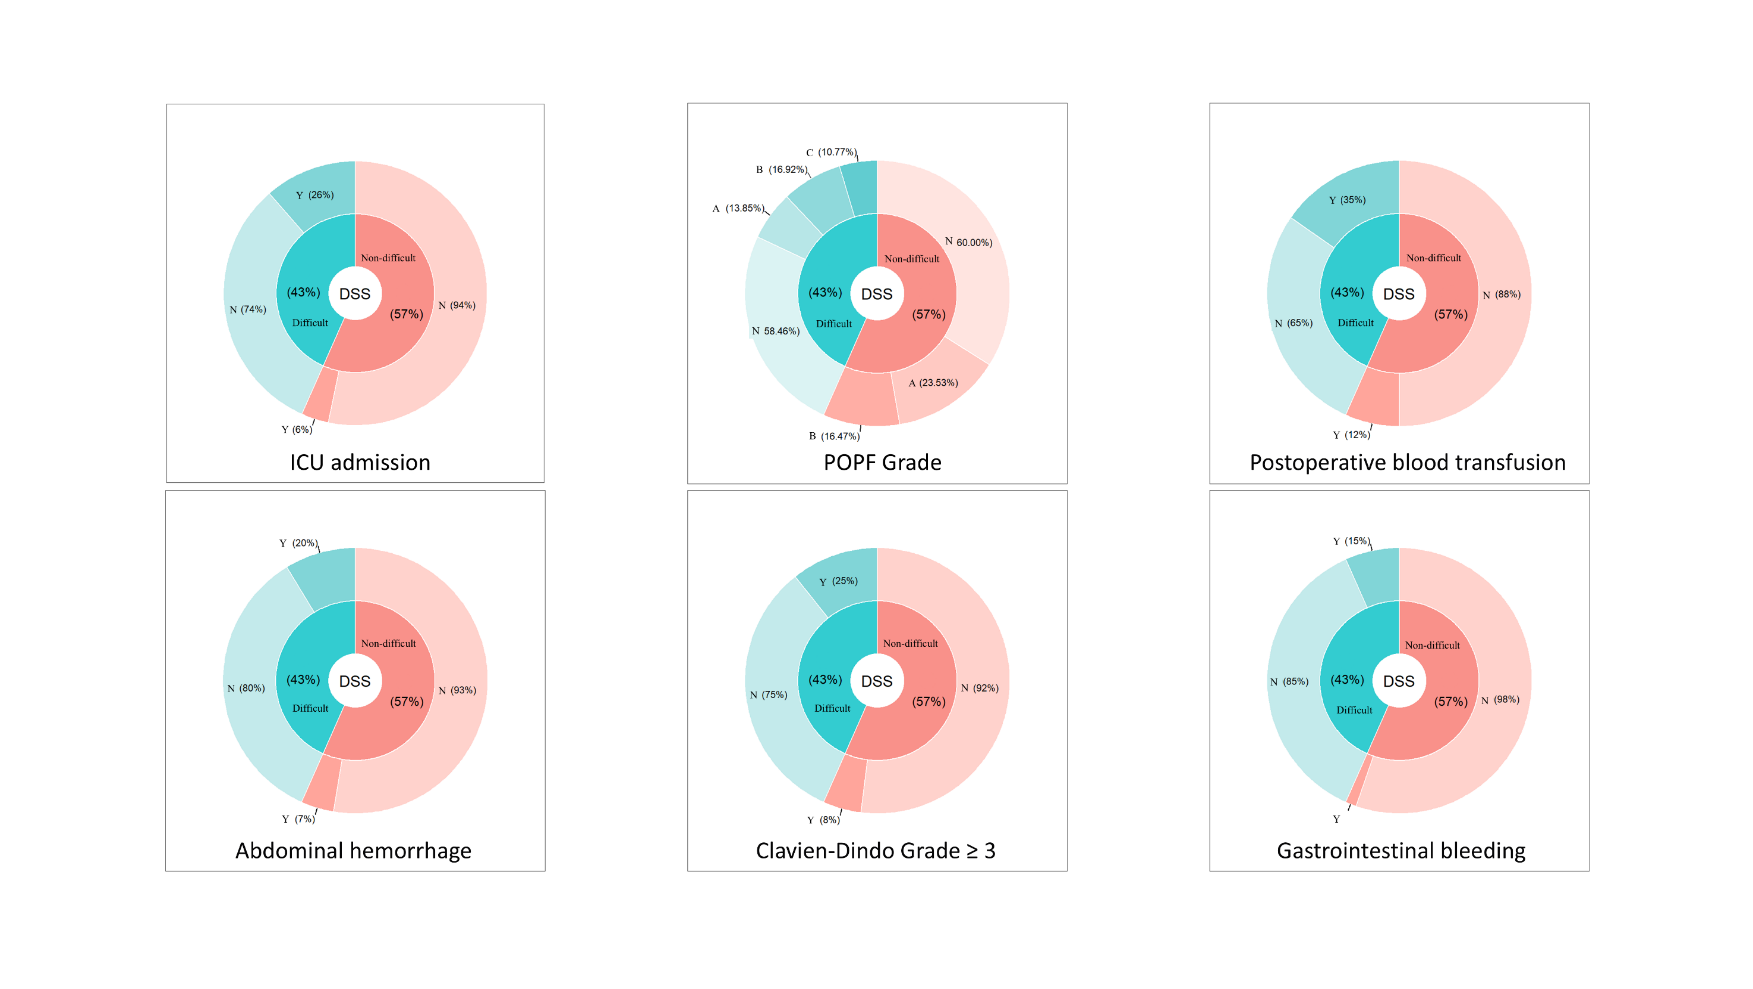


Supplementary material_2. Process of radiological feature selection


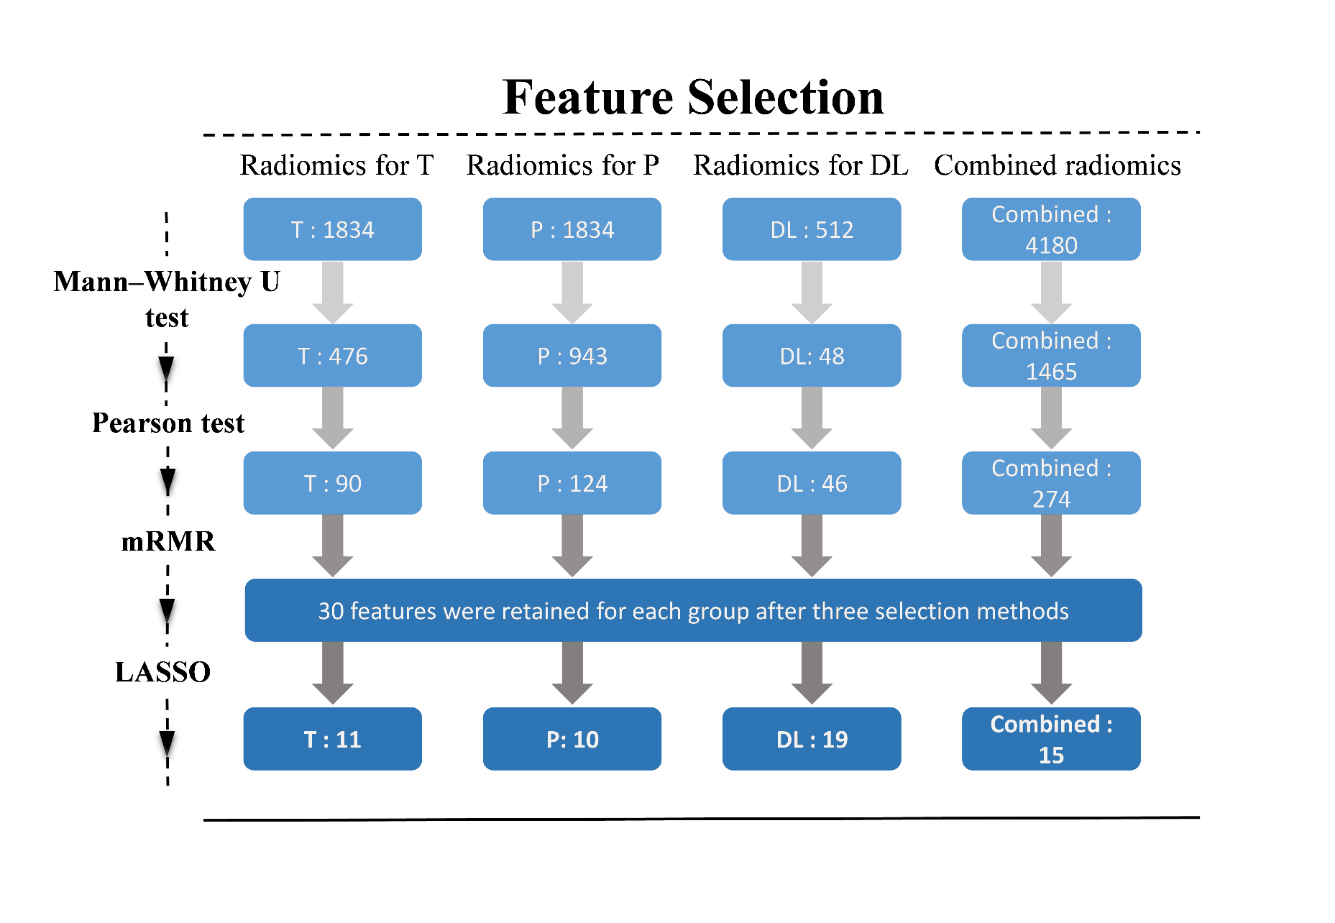


Supplementary material_3. Distribution of feature weights in different models


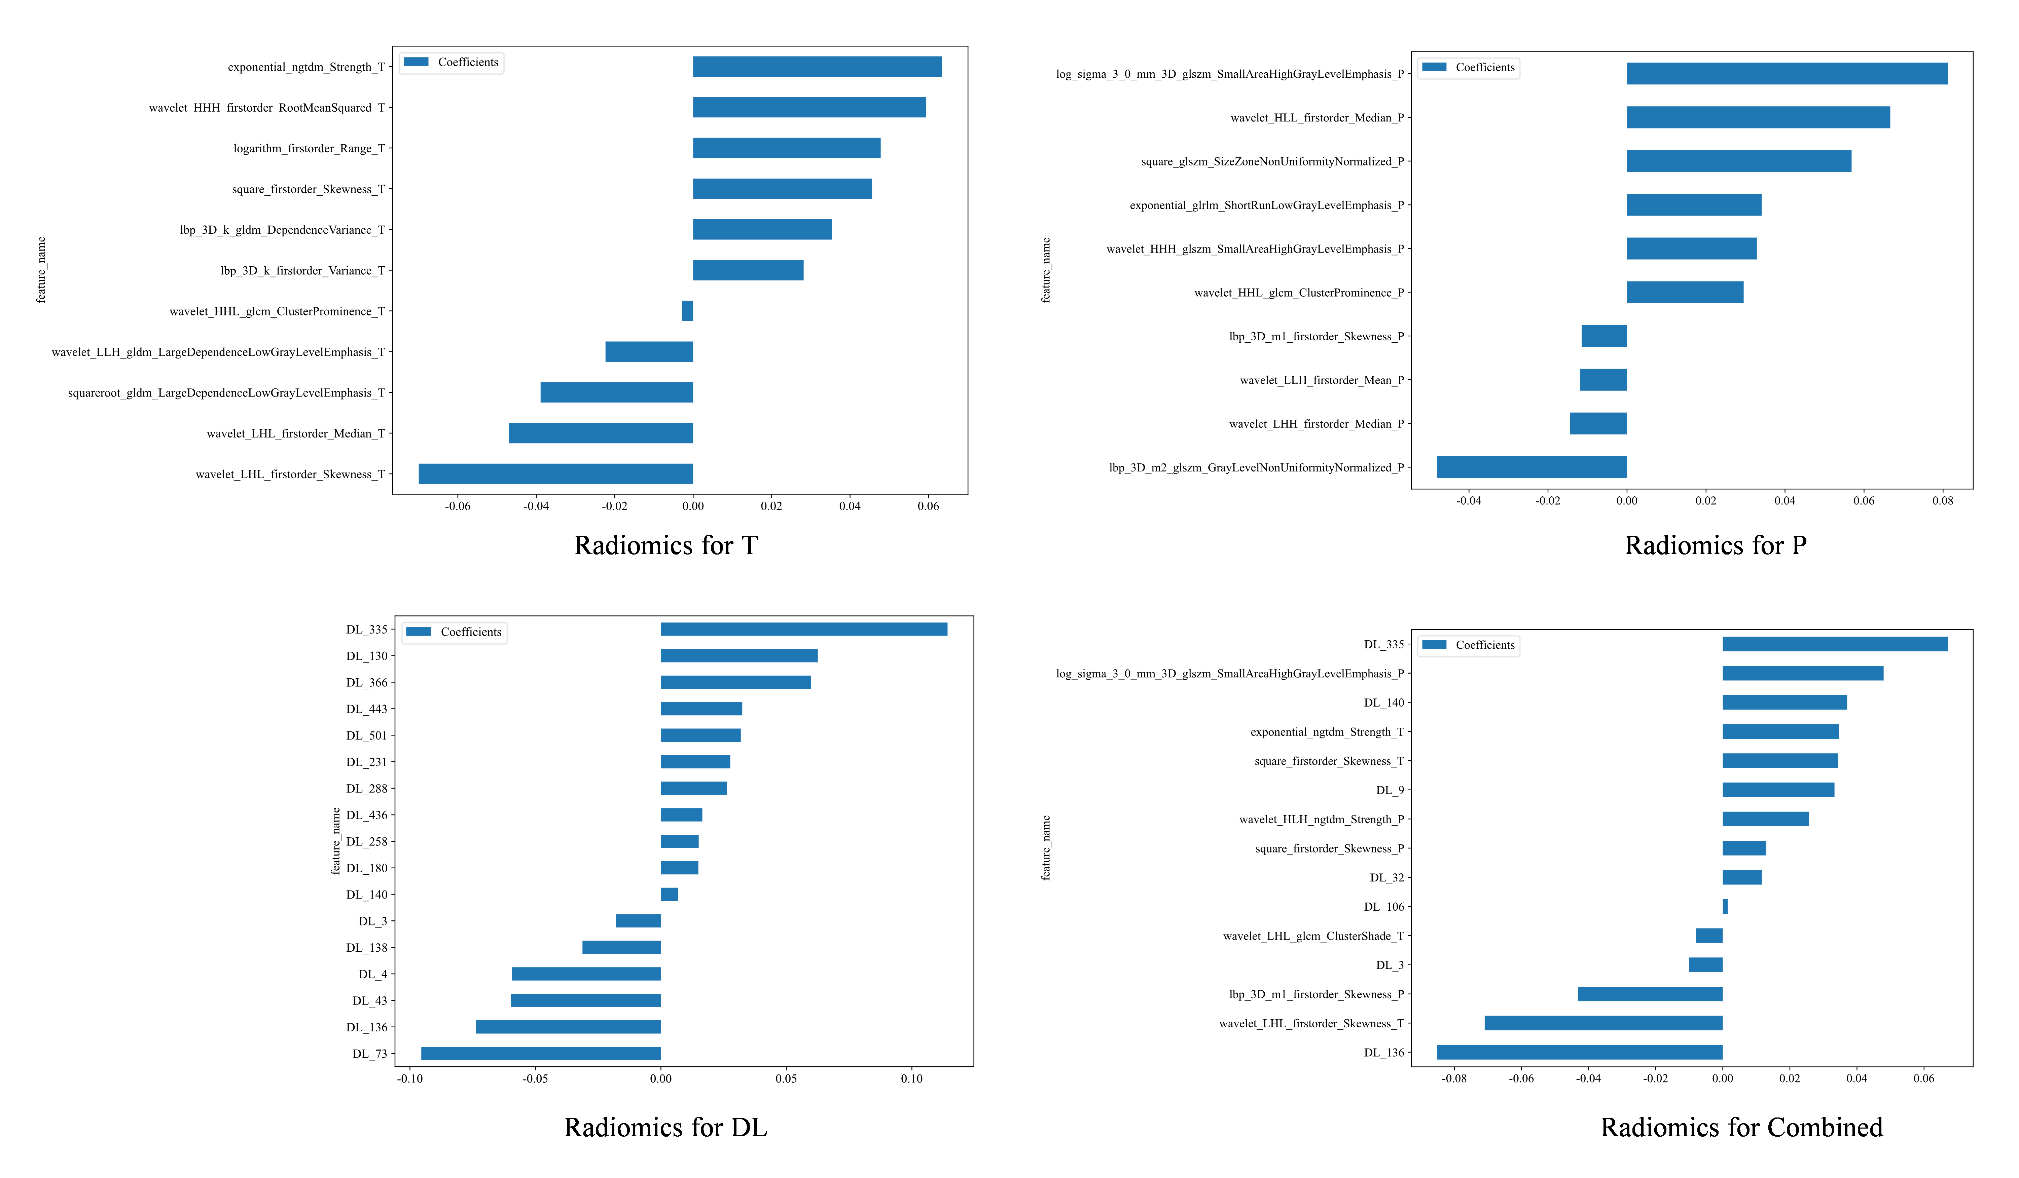

Supplement: Supplementary file 1 [file bcb3992fb9c2031122e2eb81.docx]
